# Supplementary material for: Systematic review and meta-analysis of Mental Health First Aid training: Effects on knowledge, stigma, and helping behaviour
Source: PubMed Central journal article supplement (PMC5979014; doi:10.1371/journal.pone.0197102), 2018-05-31
Supplement: pone.0197102.s002.pdf [file pone.0197102.s002.pdf]

**S2 Table. Meta-regression analyses of percentage of female participants and length of program as predictors of effect sizes in studies examining the effect of MHFA**

|                                             | % Gender |                                  |             | Length of program (hours) |                                  |             |
|---------------------------------------------|----------|----------------------------------|-------------|---------------------------|----------------------------------|-------------|
|                                             | k        | Slope point estimate<br>[95% CI] | P           | k                         | Slope point<br>estimate [95% CI] | p           |
| <b>Recognition of mental health problem</b> |          |                                  |             |                           |                                  |             |
| Post                                        | 7        | -0.01 [-0.08, 0.07]              | .857        | 4                         | 0.00 [-0.17, 0.17]               | .983        |
| <b>Beliefs about effective treatments</b>   |          |                                  |             |                           |                                  |             |
| Post                                        | 4        | -0.03 [-0.11, 0.05]              | .468        | 3                         | 0.01 [-0.14, 0.16]               | .901        |
| <=6 month FU                                | 11       | -0.01 [-0.03, 0.01]              | .301        | 10                        | -0.06 [-0.12, 0.00]              | <b>.048</b> |
| <b>Stigma</b>                               |          |                                  |             |                           |                                  |             |
| <= 6 month FU                               | 13       | -0.01 [-0.02, 0.00]              | .255        | 13                        | 0.00 [-0.07, 0.07]               | .993        |
| <b>MHFA confidence</b>                      |          |                                  |             |                           |                                  |             |
| Post                                        | 7        | -0.02 [-0.05, 0.02]              | .336        | 5                         | 0.09 [-0.03, 0.22]               | .142        |
| <= 6 month FU                               | 11       | 0.01 [-0.01, 0.02]               | .398        | 11                        | 0.02 [-0.09, 0.13]               | .730        |
| <b>MHFA Intentions</b>                      |          |                                  |             |                           |                                  |             |
| <= 6 month FU                               | 3        | 0.01 [-0.08, 0.10]               | .863        | 3                         | 0.13 [-0.10, 0.36]               | .278        |
| <b>Amount of MHFA provided</b>              |          |                                  |             |                           |                                  |             |
| <= 6 month FU                               | 8        | -0.01 [-0.02, 0.00]              | <b>.012</b> | 8                         | 0.03 [-0.07, 0.13]               | .586        |
