# Supplementary material for: Systematic review and meta-analysis of Mental Health First Aid training: Effects on knowledge, stigma, and helping behaviour
Source: PLoS One. 2018 May 31;13(5):e0197102. doi: 10.1371/journal.pone.0197102 (PMC5979014; doi:10.1371/journal.pone.0197102)
Supplement: S1 Table — (PDF) [file pone.0197102.s001.pdf]

**S1 Table. Results of sub-group analyses investigating causes of heterogeneity in effect sizes in studies evaluating MHFA**

|                                                    |                           |                     |          |                           | Difference between subgroups |        |                      |
|----------------------------------------------------|---------------------------|---------------------|----------|---------------------------|------------------------------|--------|----------------------|
|                                                    | Number of Comparisons (k) | Cohen's d [95% CI]  | <i>p</i> | I <sup>2</sup> % [95% CI] | Q-value                      | df (Q) | <i>p</i> for Q-value |
| <b>Recognition of mental health problem - Post</b> |                           |                     |          |                           |                              |        |                      |
| <i>Comparison condition</i>                        |                           |                     |          |                           | 0.93                         | 4      | .920                 |
| Waitlist                                           | 2                         | 0.04 [-0.98, 1.07]  | .935     | 0 <sup>#</sup>            |                              |        |                      |
| No intervention                                    | 2                         | 0.06 [-0.98, 1.09]  | .910     | 71 <sup>#</sup>           |                              |        |                      |
| Generic health education intervention              | 1                         | 0.15 [-1.25, 1.55]  | .835     |                           |                              |        |                      |
| Other mental health education intervention         | 1                         | -0.24 [-1.89, 1.42] | .780     |                           |                              |        |                      |
| Other                                              | 1                         | 0.58 [-0.46, 1.61]  | .273     |                           |                              |        |                      |
| <i>Delivery format</i>                             |                           |                     |          |                           |                              |        |                      |
| Face to face                                       | 3                         | 0.40 [-0.02, 0.82]  | .059     | 28 [0, 93]                | 1.24                         | 1      | .265                 |
| Online                                             | 4                         | -0.01 [-0.59, 0.58] | .980     | 19 [0, 88]                |                              |        |                      |
| <i>Program type</i>                                |                           |                     |          |                           |                              |        |                      |
| Adult MHFA                                         | 6                         | 0.26 [-0.19, 0.71]  | .254     | 37 [0, 75]                | 0.27                         | 1      | .602                 |
| Youth MHFA                                         | 1                         | -0.02 [-0.96, 0.93] | .972     |                           |                              |        |                      |
| <b>Beliefs about effective treatments - post</b>   |                           |                     |          |                           |                              |        |                      |
| <i>Comparison condition</i>                        |                           |                     |          |                           | 20.15                        | 3      | <.001                |
| Waitlist                                           | 1                         | 0.29 [0.07, 0.50]   | .008     |                           |                              |        |                      |
| Generic health education intervention              | 1                         | 0.39 [0.20, 0.59]   | <.001    |                           |                              |        |                      |
| Other mental health education intervention         | 1                         | -0.07 [-0.80, 0.67] | .862     |                           |                              |        |                      |
| Other                                              | 1                         | 0.91 [0.69, 1.13]   | <.001    |                           |                              |        |                      |

|                                                                     |    |                     |                 |                 |       |   |             |
|---------------------------------------------------------------------|----|---------------------|-----------------|-----------------|-------|---|-------------|
| <i>Delivery format</i>                                              |    |                     |                 |                 | 0.71  | 1 | .401        |
| Face to face                                                        | 2  | 0.60 [0.03, 1.17]   | <b>.041</b>     | 94 <sup>#</sup> |       |   |             |
| Online                                                              | 2  | 0.23 [-0.42, 0.87]  | .487            | 28 <sup>#</sup> |       |   |             |
| <i>Program type</i>                                                 |    |                     |                 |                 | 0.23  | 1 | .635        |
| Adult MHFA                                                          | 3  | 0.50 [0.04, 0.97]   | <b>.035</b>     | 87 [61, 95]     |       |   |             |
| Youth MHFA                                                          | 1  | 0.29 [-0.45, 1.03]  | .445            |                 |       |   |             |
| <b>Beliefs about effective treatments - &lt;= 6-month follow-up</b> |    |                     |                 |                 |       |   |             |
| <i>Comparison condition</i>                                         |    |                     |                 |                 | 12.85 | 3 | <b>.005</b> |
| Waitlist                                                            | 7  | 0.15 [0.05, 0.24]   | <b>.002</b>     | 30 [0, 70]      |       |   |             |
| No intervention                                                     | 2  | 0.33 [-0.06, 0.72]  | .102            | 0 <sup>#</sup>  |       |   |             |
| Other mental health education intervention                          | 1  | -0.09 [-0.81, 0.62] | .795            |                 |       |   |             |
| Other                                                               | 1  | 0.61 [0.36, 0.86]   | <b>&lt;.001</b> |                 |       |   |             |
| <i>Delivery format</i>                                              |    |                     |                 |                 | 0.56  | 1 | .454        |
| Face to face                                                        | 10 | 0.20 [0.07, 0.33]   | <b>.002</b>     | 62 [24, 81]     |       |   |             |
| Online                                                              | 1  | -0.09 [-0.86, 0.67] | .809            |                 |       |   |             |
| <i>Program type</i>                                                 |    |                     |                 |                 | 0.03  | 1 | .857        |
| Adult MHFA                                                          | 10 | 0.19 [0.05, 0.33]   | <b>.010</b>     | 63 [26, 81]     |       |   |             |
| Youth MHFA                                                          | 1  | 0.23 [-0.17, 0.63]  | .264            |                 |       |   |             |
| <b>Stigma - &lt;= 6-month follow-up</b>                             |    |                     |                 |                 |       |   |             |
| <i>Comparison condition</i>                                         |    |                     |                 |                 | 2.27  | 3 | .518        |
| Waitlist                                                            | 8  | 0.15 [0.02, 0.29]   | <b>.027</b>     | 0 [0, 68]       |       |   |             |
| No intervention                                                     | 3  | 0.22 [0.01, 0.44]   | <b>.039</b>     | 85 [54, 95]     |       |   |             |

|                                            |    |                     |       |                 |       |      |       |
|--------------------------------------------|----|---------------------|-------|-----------------|-------|------|-------|
| Other mental health education intervention | 2  | -0.09 [-0.45, 0.27] | .629  | 69 <sup>#</sup> |       |      |       |
| Other                                      | 1  | 0.09 [-0.26, 0.43]  | .624  |                 |       |      |       |
| <i>Delivery format</i>                     |    |                     |       |                 | 0.99  | 1    | .320  |
| Face to face                               | 13 | 0.13 [0.04, 0.22]   | .005  | 50 [5, 74]      |       |      |       |
| Online                                     | 1  | 0.56 [-0.28, 1.40]  | .191  |                 |       |      |       |
| <i>Program type</i>                        |    |                     |       |                 | 1.47  | 1    | .226  |
| Adult MHFA                                 | 13 | 0.13 [0.04, 0.22]   | .005  | 48 [2, 73]      |       |      |       |
| Youth MHFA                                 | 1  | 0.51 [-0.10, 1.12]  | .103  |                 |       |      |       |
| <b>MHFA confidence - post</b>              |    |                     |       |                 |       |      |       |
| <i>Comparison condition</i>                |    |                     |       |                 | 27.21 | 4.00 | <.001 |
| Waitlist                                   | 2  | 1.11 [0.79, 1.43]   | <.001 | 0 <sup>#</sup>  |       |      |       |
| No intervention                            | 1  | 0.64 [0.10, 1.19]   | .020  |                 |       |      |       |
| Generic health education intervention      | 1  | 0.24 [0.04, 0.43]   | .017  |                 |       |      |       |
| Other mental health education intervention | 2  | 0.16 [-0.10, 0.43]  | .228  | 0 <sup>#</sup>  |       |      |       |
| Other                                      | 1  | 0.60 [0.38, 0.81]   | <.001 |                 |       |      |       |
| <i>Delivery format</i>                     |    |                     |       |                 | 0.72  | 1    | .395  |
| Face to face                               | 4  | 0.70 [0.30, 1.10]   | .001  | 86 [64, 94]     |       |      |       |
| Online                                     | 3  | 0.42 [-0.08, 0.92]  | .098  | 7 [0, 91]       |       |      |       |
| <i>Program type</i>                        |    |                     |       |                 | 2.82  | 1    | .093  |
| Adult MHFA                                 | 6  | 0.51 [0.22, 0.79]   | <.001 | 78 [52, 90]     |       |      |       |
| Youth MHFA                                 | 1  | 1.36 [0.40, 2.31]   | .005  |                 |       |      |       |
|                                            |    |                     |       |                 |       |      |       |

| MHFA confidence - <= 6-month follow-up     |    |                    |       |                 |      |   |      |
|--------------------------------------------|----|--------------------|-------|-----------------|------|---|------|
| Comparison condition                       |    |                    |       |                 | 2.21 | 3 | .529 |
| Waitlist                                   | 6  | 0.52 [0.26, 0.77]  | <.001 | 63 [11, 85]     |      |   |      |
| No intervention                            | 3  | 0.63 [0.25, 1.01]  | .001  | 92 [80, 97]     |      |   |      |
| Other mental health education intervention | 2  | 0.16 [-0.35, 0.67] | .541  | 0 <sup>#</sup>  |      |   |      |
| Other                                      | 1  | 0.40 [-0.17, 0.98] | .172  |                 |      |   |      |
|                                            |    |                    |       |                 |      |   |      |
| Delivery format                            |    |                    |       |                 | 0.04 | 1 | .850 |
| Face to face                               | 11 | 0.47 [0.31, 0.63]  | <.001 | 79 [63, 88]     |      |   |      |
| Online                                     | 1  | 0.38 [-0.54, 1.30] | .417  |                 |      |   |      |
|                                            |    |                    |       |                 |      |   |      |
| Program type                               |    |                    |       |                 | 2.59 | 1 | .108 |
| Adult MHFA                                 | 10 | 0.42 [0.27, 0.58]  | <.001 | 78 [61, 88]     |      |   |      |
| Youth MHFA                                 | 2  | 0.88 [0.35, 1.41]  | .001  | 0 <sup>#</sup>  |      |   |      |
|                                            |    |                    |       |                 |      |   |      |
| MHFA confidence - >6-month follow-up       |    |                    |       |                 |      |   |      |
| Comparison condition                       |    |                    |       |                 | 1.40 | 1 | .237 |
| no intervention                            | 1  | 0.48 [-0.07, 1.03] | .088  |                 |      |   |      |
| generic health education intervention      | 1  | 0.12 [-0.10, 0.34] | .285  |                 |      |   |      |
|                                            |    |                    |       |                 |      |   |      |
| Program type                               |    |                    |       |                 | 1.40 | 1 | .237 |
| Adult MHFA                                 | 1  | 0.48 [-0.07, 1.03] | .088  |                 |      |   |      |
| Youth MHFA                                 | 1  | 0.12 [-0.10, 0.34] | .285  |                 |      |   |      |
|                                            |    |                    |       |                 |      |   |      |
| MHFA intentions - <= 6-month follow-up     |    |                    |       |                 |      |   |      |
| Program type                               |    |                    |       |                 | 0.01 | 1 | .933 |
| Adult MHFA                                 | 2  | 0.58 [-0.30, 1.45] | 0.198 | 95 <sup>#</sup> |      |   |      |
| Youth MHFA                                 | 1  | 0.51 [-0.83, 1.85] | 0.457 |                 |      |   |      |

| <b>MHFA intentions - &gt;6-month follow-up</b>           |   |                     |       |                 |         |
|----------------------------------------------------------|---|---------------------|-------|-----------------|---------|
| <i>Comparison condition</i>                              |   |                     |       | 1.93            | 1 .165  |
| no intervention                                          | 1 | 0.55 [-0.00, 1.10]  | .051  |                 |         |
| generic health education intervention                    | 1 | 0.13 [-0.09, 0.35]  | .254  |                 |         |
|                                                          |   |                     |       |                 |         |
| <i>Program type</i>                                      |   |                     |       | 1.93            | 1 .165  |
| Adult MHFA                                               | 1 | 0.55 [-0.00, 1.10]  | .051  |                 |         |
| Youth MHFA                                               | 1 | 0.13 [-0.09, 0.35]  | .254  |                 |         |
|                                                          |   |                     |       |                 |         |
| <b>Amount of MHFA provided - &lt;= 6-month follow-up</b> |   |                     |       |                 |         |
| <i>Comparison condition</i>                              |   |                     |       | 17.44           | 2 <.001 |
| Waitlist                                                 | 5 | 0.25 [0.14, 0.35]   | <.001 | 0 [0, 79]       |         |
| No intervention                                          | 2 | 0.43 [0.32, 0.55]   | <.001 | 26 <sup>#</sup> |         |
| Other mental health education intervention               | 2 | -0.21 [-0.50, 0.09] | .170  | 0 <sup>#</sup>  |         |
|                                                          |   |                     |       |                 |         |
| <i>Delivery format</i>                                   |   |                     |       | 2.01            | 1 .156  |
| Face to face                                             | 8 | 0.25 [0.11, 0.40]   | .001  | 63 [19, 83]     |         |
| Online                                                   | 1 | -0.39 [-1.27, 0.49] | .381  |                 |         |
|                                                          |   |                     |       |                 |         |
| <i>Program type</i>                                      |   |                     |       | 0.11            | 1 .738  |
| Adult MHFA                                               | 8 | 0.22 [0.07, 0.38]   | .005  | 67 [31, 84]     |         |
| Youth MHFA                                               | 1 | 0.34 [-0.31, 0.99]  | .307  |                 |         |
|                                                          |   |                     |       |                 |         |
| <b>Quality of MHFA provided - post</b>                   |   |                     |       |                 |         |
| <i>Comparison condition</i>                              |   |                     |       | 2.76            | 1 .096  |
| No intervention                                          | 1 | 1.64 [0.10, 3.18]   | .037  |                 |         |
| Other mental health education intervention               | 1 | -0.10 [-1.45, 1.26] | .889  |                 |         |

|                        |   |                     |             |      |   |      |
|------------------------|---|---------------------|-------------|------|---|------|
| <i>Delivery format</i> |   |                     |             | 2.76 | 1 | .096 |
| Face to face           | 1 | -0.10 [-1.45, 1.26] | .889        |      |   |      |
| Online                 | 1 | 1.64 [0.10, 3.18]   | <b>.037</b> |      |   |      |

|                                  |   |                     |      |      |   |      |
|----------------------------------|---|---------------------|------|------|---|------|
| <b>Quality of MHFA provided</b>  |   |                     |      |      |   |      |
| <b>- &lt;= 6-month follow-up</b> |   |                     |      |      |   |      |
| <i>Delivery format</i>           |   |                     |      | 1.21 | 1 | .272 |
| Face to face                     | 1 | -0.22 [-0.76, 0.31] | .411 |      |   |      |
| Online                           | 1 | 0.20 [-0.34, 0.74]  | .465 |      |   |      |

# too few studies to calculate confidence interval
